# Supplementary material
Source: PubMed Central journal article supplement (PMC3744987)

Supplemental Table 1. Clinical Characteristics of Subjects Studied

| Subject # | Age (years) | Disease           | Previous Chemotherapy | Outcome          | % fibrocytes in CD14 <sup>+</sup> gate |
|-----------|-------------|-------------------|-----------------------|------------------|----------------------------------------|
| 1         | 3           | ARMS <sup>1</sup> | yes                   | DOD <sup>2</sup> | 0.49                                   |
| 2         | 3           | ARMS              | yes                   | Alive            | 1.41                                   |
| 3         | 6           | ARMS              | no                    | DOD              | 14.7                                   |
| 4         | 7           | ARMS              | yes                   | DOD              | 22.7                                   |
| 5         | 8           | Ewing Sarcoma     | yes                   | DOD              | 0.16                                   |
| 6         | 8           | Ewing Sarcoma     | yes                   | DOD              | 1.53                                   |
| 7         | 9           | Ewing Sarcoma     | Yes                   | DOD              | 0.72                                   |
| 8         | 9           | Ewing Sarcoma     | yes                   | DOD              | 2.5                                    |
| 9         | 10          | ARMS              | no                    | DOD              | 0.79                                   |
| 10        | 10          | Ewing Sarcoma     | yes                   | DOD              | 1.79                                   |
| 11        | 10          | Ewing Sarcoma     | yes                   | DOD              | 0.98                                   |
| 12        | 11          | Ewing Sarcoma     | yes                   | DOD              | 0.59                                   |
| 13        | 11          | Ewing Sarcoma     | no                    | DOD              | 3.3                                    |
| 14        | 13          | ARMS              | no                    | DOC <sup>3</sup> | 1.11                                   |
| 15        | 14          | Ewing Sarcoma     | no                    | DOD              | 0.16                                   |
| 16        | 14          | ARMS              | no                    | DOD              | 2.03                                   |
| 17        | 14          | ARMS              | no                    | DOD              | 0.21                                   |
| 18        | 15          | ARMS              | yes                   | DOD              | 0.14                                   |
| 19        | 15          | Ewing Sarcoma     | yes                   | DOD              | 2.58                                   |
| 20        | 15          | ARMS              | yes                   | DOD              | 0.01                                   |
| 21        | 15          | Ewing Sarcoma     | no                    | DOD              | 9.14                                   |
| 22        | 16          | ARMS              | yes                   | unknown          | 0.67                                   |
| 23        | 16          | Ewing Sarcoma     | yes                   | DOD              | 0.49                                   |
| 24        | 17          | ARMS              | no                    | Alive            | 0.1                                    |
| 25        | 17          | ARMS              | no                    | Alive            | 0.14                                   |
| 26        | 17          | Ewing Sarcoma     | yes                   | DOD              | 1.03                                   |
| 27        | 17          | Ewing Sarcoma     | no                    | unknown          | 2.24                                   |
| 28        | 17          | Ewing Sarcoma     | yes                   | DOD              | 1.22                                   |
| 29        | 17          | ARMS              | no                    | Alive            | 10.1                                   |
| 30        | 18          | Ewing Sarcoma     | yes                   | DOD              | 0.21                                   |
| 31        | 18          | Ewing Sarcoma     | yes                   | DOD              | 1.26                                   |
| 32        | 18          | Ewing Sarcoma     | no                    | DOD              | 2.52                                   |
| 33        | 18          | Ewing Sarcoma     | no                    | DOD              | 7.35                                   |
| 34        | 18          | Ewing Sarcoma     | yes                   | DOD              | 0.35                                   |
| 35        | 18          | ARMS              | no                    | DOD              | 0.22                                   |
| 36        | 18          | Ewing Sarcoma     | no                    | DOD              | 10                                     |
| 37        | 18          | Ewing Sarcoma     | Yes                   | DOD              | 53.2                                   |
| 38        | 19          | Ewing Sarcoma     | no                    | unknown          | 0.39                                   |
| 39        | 19          | Ewing Sarcoma     | no                    | DOD              | 0.1                                    |
| 40        | 19          | Ewing Sarcoma     | no                    | DOD              | 0.44                                   |
| 41        | 20          | ARMS              | no                    | Alive            | 0.36                                   |

|    |    |               |     |       |      |
|----|----|---------------|-----|-------|------|
| 42 | 20 | Ewing Sarcoma | no  | DOD   | 0.57 |
| 43 | 20 | Ewing Sarcoma | no  | DOD   | 0.27 |
| 44 | 22 | ARMS          | no  | DOD   | 3.98 |
| 45 | 23 | Ewing Sarcoma | no  | DOD   | 0.38 |
| 46 | 23 | Ewing Sarcoma | yes | DOD   | 0.57 |
| 47 | 24 | Ewing Sarcoma | yes | DOD   | 0.57 |
| 48 | 26 | Ewing Sarcoma | yes | DOD   | 1.66 |
| 49 | 27 | ARMS          | yes | Alive | 0.14 |
| 50 | 28 | ARMS          | no  | Alive | 1.85 |
| 51 | 30 | Ewing Sarcoma | no  | DOD   | 1.57 |
| 52 | 30 | Ewing Sarcoma | yes | DOD   | 35.7 |
| 53 | 33 | Ewing Sarcoma | yes | DOD   | 0.71 |

<sup>1</sup>ARMS: alveolar rhabdomyosarcoma, <sup>2</sup>DOD: dead of disease, <sup>3</sup>DOC: dead of complications of therapy.

**Supplemental Figure. A:** Gating strategy employed on the dot plot used for further characterization of specific subsets. **B:** Cell surface phenotype of electronically gated subsets. Shaded areas represent background fluorescence as indicated by FMO controls. This is a representative of more than ten experiments.

A

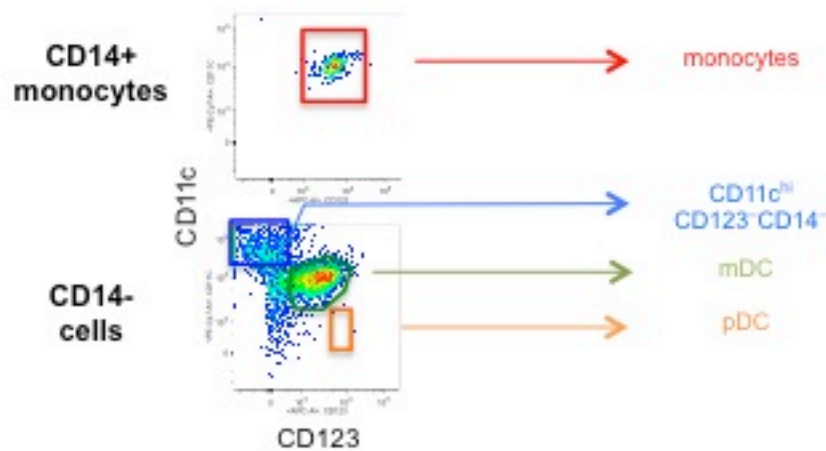

B

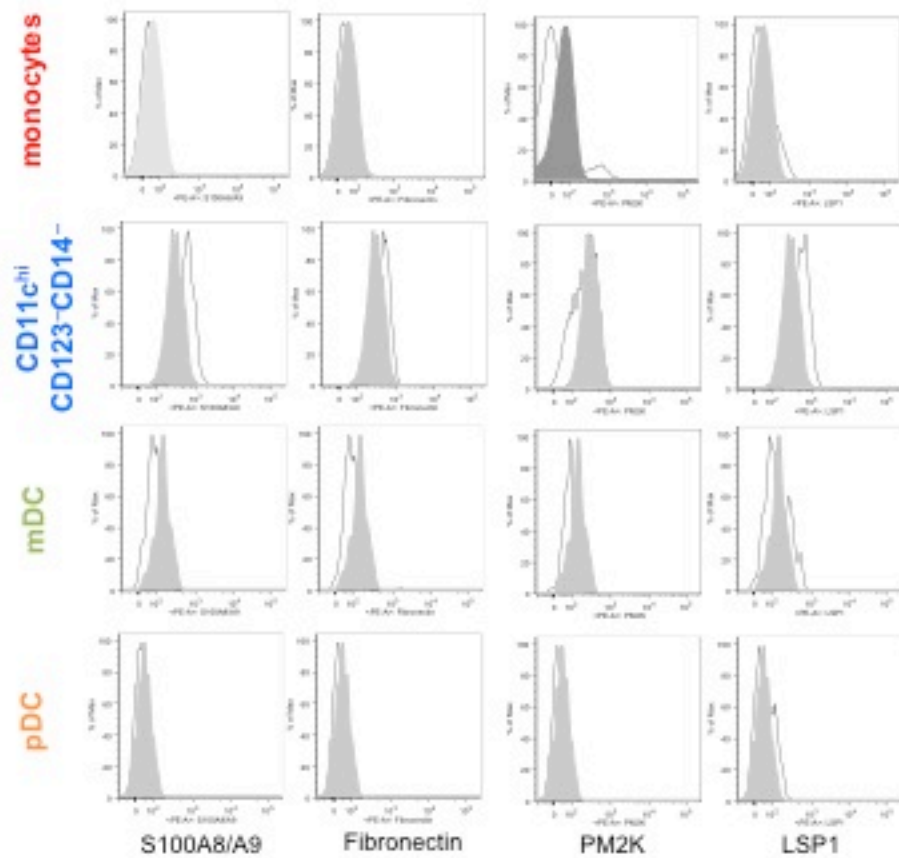

Supplement: supp_blood-2012-08-449413_blood-2012-08-449413-1.pdf [file supp_blood-2012-08-449413_blood-2012-08-449413-1.pdf]
